# Supplementary material for: TEM nano-Moiré evaluation for an invisible lattice structure near the grain interface
Source: Royal Society of Chemistry journal article supplement (doi:10.1039/c7nr04262k), 2017-01-01
Supplement: c7nr04262k1.pdf [file c7nr04262k1.pdf]

#### Card Information

Names: Zirconium Oxide  
Formula: Zr O<sub>2</sub>  
PDF Number: 49-1642  
Quality: indexed  
Subfiles: inorganic alloy COR CP FOR SCM

#### Cell and Symmetry Information

System: cubic Space Group: Fm-3m (no. 225)  
a: 5.128  
Z: 4

#### Instrument Information

Radiation: CuKα1 Wavelength: 1.5406 Filter:

Quartz

Instrument(d): diffractometer Standard: Si  
Instrument(l): diffractometer l type: unknown

#### Comments and Additional Information

Preparation: Prepared by sintering 10 wt.% Zr O<sub>2</sub> in Al<sub>2</sub> O<sub>3</sub> at 1973 K for 90 minutes at a pressure of 0.133 MPa. The oxygen deficient phase was synthesized by annealing in vacuum at pressures below 2.8x10<sup>-2</sup> MPa.

General: Oxygen deficient structure (in range of Zr O 1.688-Zr O 1.740).

Pattern: See 00-022-0540.

Pattern: To replace 00-027-0997.

#### Literature References

General: Tomaszewski, H., Godwod, K. J. Eur. Ceram. Soc. 15 17 (1995)  
Unit Cell: Duwez, Odell. J. Am. Ceram. Soc. 33 274 (1950)

#### Peak Data

##### PeakList

|  | h | k | l | d      | I   |
|--|---|---|---|--------|-----|
|  | 1 | 1 | 1 | 2.9646 | 100 |
|  | 2 | 0 | 0 | 2.5645 | 17  |
|  | 2 | 2 | 0 | 1.8152 | 32  |
|  | 3 | 1 | 1 | 1.5467 | 16  |
|  | 2 | 2 | 2 | 1.4810 | 2   |
|  | 4 | 0 | 0 | 1.2809 | 1   |
|  | 3 | 3 | 1 | 1.1770 | 2   |
|  | 4 | 2 | 0 | 1.1468 | 3   |
|  | 4 | 2 | 2 | 1.0470 | 1   |
|  | 3 | 3 | 3 | 0.9865 | 1   |
|  | 5 | 3 | 1 | 0.8669 | 1   |
|  | 6 | 0 | 0 | 0.8547 | 1   |
