# Supplementary material for: TEM nano-Moiré evaluation for an invisible lattice structure near the grain interface
Source: Royal Society of Chemistry journal article supplement (doi:10.1039/c7nr04262k), 2017-01-01
Supplement: c7nr04262k2.pdf [file c7nr04262k2.pdf]

PDF#88-0826: QM=Calculated(C); d=Calculated; l=Calculated

Aluminum Oxide

Al<sub>2</sub>O<sub>3</sub>

Radiation=CuKα1      Lambda=1.54060      Filter=

Calibration=      2θ=25.566-88.953      I/Ic(RIR)=0.87

Ref: Calculated from ICSD using POWD-12++

Rhombohedral - Profile Analysis, R-3c (167)      Z=6      mp=

CELL: 4.7607 x 4.7607 x 12.997 <90.0 x 90.0 x 120.0>      P.S=hR10 (\$GA) (?)

Density(c)=3.981      Density(m)=3.39A      Mwt=101.96      Vol=255.10      F(25)=99

9.9(.0000,25/0)

Ref: Liu, R.S., Shi, W.C., Cheng, Y.C., Huang, C.Y.

Mod. Phys. Lett. B, v11 p1169 (1997)

Strong Lines: 2.55/X 2.09/9 1.60/8 3.48/7 2.38/5 1.74/4 1.37/4 1.41/3 1.24/1 1.51/1

FIZ=085137: Rietveld profile refinement applied ITF See PDF 01-081-1667.

Crystal structures and peculiar magnetic properties of alpha- and gamma-(Al<sub>2</sub>O<sub>3</sub>) powders e c  
(R3-CH) A2X3

| 2-Theta | d(?)   | I(v)  | (h k l)  | Theta  | 1/(2d) | 2pi/d  | n <sup>2</sup> |
|---------|--------|-------|----------|--------|--------|--------|----------------|
| 25.566  | 3.4814 | 43.1  | (0 1 2)  | 12.783 | 0.1436 | 1.8048 |                |
| 35.136  | 2.5520 | 79.4  | (1 0 4)  | 17.568 | 0.1959 | 2.4621 |                |
| 37.761  | 2.3804 | 38.6  | (1 1 0)  | 18.881 | 0.2101 | 2.6396 |                |
| 41.660  | 2.1662 | 0.5   | (0 0 6)  | 20.830 | 0.2308 | 2.9006 |                |
| 43.336  | 2.0862 | 91.2  | (1 1 3)  | 21.668 | 0.2397 | 3.0118 |                |
| 46.159  | 1.9649 | 1.3   | (2 0 2)  | 23.080 | 0.2545 | 3.1976 |                |
| 52.529  | 1.7407 | 49.2  | (0 2 4)  | 26.265 | 0.2872 | 3.6096 |                |
| 57.475  | 1.6021 | 100.0 | (1 1 6)  | 28.737 | 0.3121 | 3.9219 |                |
| 59.715  | 1.5472 | 2.7   | (2 1 1)  | 29.858 | 0.3232 | 4.0610 |                |
| 61.104  | 1.5153 | 3.6   | (1 2 2)  | 30.552 | 0.3300 | 4.1464 |                |
| 61.276  | 1.5115 | 9.2   | (0 1 8)  | 30.638 | 0.3308 | 4.1569 |                |
| 66.489  | 1.4051 | 39.7  | (2 1 4)  | 33.245 | 0.3559 | 4.4718 |                |
| 68.179  | 1.3743 | 61.1  | (3 0 0)  | 34.090 | 0.3638 | 4.5719 |                |
| 70.385  | 1.3365 | 1.4   | (1 2 5)  | 35.192 | 0.3741 | 4.7011 |                |
| 74.267  | 1.2760 | 1.4   | (2 0 8)  | 37.133 | 0.3919 | 4.9242 |                |
| 76.838  | 1.2396 | 17.3  | (1 0 10) | 38.419 | 0.4034 | 5.0688 |                |
| 77.200  | 1.2347 | 10.5  | (1 1 9)  | 38.600 | 0.4050 | 5.0890 |                |
| 80.381  | 1.1936 | 1.0   | (2 1 7)  | 40.190 | 0.4189 | 5.2640 |                |
| 80.662  | 1.1902 | 6.6   | (2 2 0)  | 40.331 | 0.4201 | 5.2792 |                |
| 83.177  | 1.1604 | 0.5   | (0 3 6)  | 41.589 | 0.4309 | 5.4144 |                |
| 84.316  | 1.1477 | 5.5   | (2 2 3)  | 42.158 | 0.4357 | 5.4748 |                |
| 85.099  | 1.1391 | 0.4   | (1 3 1)  | 42.550 | 0.4390 | 5.5160 |                |
| 86.310  | 1.1262 | 4.1   | (3 1 2)  | 43.155 | 0.4440 | 5.5792 |                |
| 86.461  | 1.1246 | 3.1   | (1 2 8)  | 43.231 | 0.4446 | 5.5870 |                |
| 88.953  | 1.0994 | 7.2   | (0 2 10) | 44.477 | 0.4548 | 5.7149 |                |
